# Supplementary material for: Knowledge, attitude and practice of physicians towards herbal remedies in Rasht, north of Iran
Source: PubMed Central journal article supplement (PMC9704890; doi:10.1097/md.0000000000031762), 2022-11-25
Supplement: medi-101-e31762-s001.pdf [file medi-101-e31762-s001.pdf]

## Appendix 1- Questionnaire questions

| <b>Knowledge questions</b>                                                                                 |                                                                                                                                                                                       |
|------------------------------------------------------------------------------------------------------------|---------------------------------------------------------------------------------------------------------------------------------------------------------------------------------------|
| 1.                                                                                                         | Can you name any herbal medicine? Please name ....                                                                                                                                    |
| 2.                                                                                                         | Can you please number any clinical use for each named herbal medicine?                                                                                                                |
| 3.                                                                                                         | Can you please say a contraindication for each named herbal medicine?                                                                                                                 |
| 4.                                                                                                         | Can you please say a drug interaction for each named herbal medicine?                                                                                                                 |
| 5.                                                                                                         | Can you please say an adverse reaction related to each named herbal medicine?                                                                                                         |
| 6.                                                                                                         | Could you please tell us name of some of herbal medicine pharmacopeia?                                                                                                                |
| <b>Attitude Questions</b>                                                                                  |                                                                                                                                                                                       |
| <i>(Likert scale except number 7 question: Highly Agree, agree, no comment, disagree, highly disagree)</i> |                                                                                                                                                                                       |
| 1.                                                                                                         | I am interested in herbal medicine.                                                                                                                                                   |
| 2.                                                                                                         | Herbal medicine and its products can be applicate clinically separately.                                                                                                              |
| 3.                                                                                                         | Herbal medicine and its products along with conventional medicine can be used.                                                                                                        |
| 4.                                                                                                         | Effect of herbal medicine is usually because of its placebo effect.                                                                                                                   |
| 5.                                                                                                         | Herbal medicine should be research and evaluate more by universities.                                                                                                                 |
| 6.                                                                                                         | If an herbal medicine has an equal effect with chemical drug, I choose herbal medicine.                                                                                               |
| 7.                                                                                                         | I have not prescribed herbal medicines because: a) non-hygienic standard preparation, b) non-efficacy, c) not evidence-based, d) adverse effects of them, e) other (please name ....) |
| 8.                                                                                                         | What is your opinion for putting herbal medicine education in continuous medical education programs?                                                                                  |
| 9.                                                                                                         | What is your opinion for putting herbal medicine education in general practitioner training curriculum?                                                                               |
| <b>Practice questions</b>                                                                                  |                                                                                                                                                                                       |
| 1.                                                                                                         | Did you ever prescribe herbal medicine? (If your answer is positive please answer left questions).                                                                                    |
| 2.                                                                                                         | Please name some herbal medicine prescribed.                                                                                                                                          |
| 3.                                                                                                         | Please say a clinical use for each named herbal medicine.                                                                                                                             |
| 4.                                                                                                         | Please say a contraindication for each named herbal medicine.                                                                                                                         |
| 5.                                                                                                         | Please say a chemical drug for each named herbal medicine, that make drug interaction.                                                                                                |
| 6.                                                                                                         | Please say an adverse drug reaction for each named herbal medicine.                                                                                                                   |
| 7.                                                                                                         | On average, in every 20 patient visits, how many times do you prescribe at least one herbal remedy?                                                                                   |
| 8.                                                                                                         | For which of these problems do you prescribe herbal remedies?                                                                                                                         |
| 9.                                                                                                         | Do you give any information to your patients about role of herbal remedies in health?                                                                                                 |
| 10.                                                                                                        | Do you prescribe herbal remedies for your family?                                                                                                                                     |
